# Supplementary material
Source: PubMed Central journal article supplement (PMC4442105)
Supplement: supp_WNL.0000000000001593_Appendix_e-1.pdf [file supp_WNL.0000000000001593_Appendix_e-1.pdf]

### **Appendix e-1: Additional Investigations**

Urinary sediment and urine organic acids were negative.

Serum and urinary toxicology were negative, except for opiates.
