# Supplementary material
Source: PubMed Central journal article supplement (PMC4442105)
Supplement: supp_WNL.0000000000001593_Supplementary_Table_e-1.pdf [file supp_WNL.0000000000001593_Supplementary_Table_e-1.pdf]

**Supplementary Table e-1: CSF Investigations**

| <b>CSF Investigations</b>                                                                                                |                                                                                                                     |                                  |                      |
|--------------------------------------------------------------------------------------------------------------------------|---------------------------------------------------------------------------------------------------------------------|----------------------------------|----------------------|
| <b>Routine Studies</b><br>(Within normal limits)                                                                         | <b>Infectious Studies</b>                                                                                           |                                  | <b>Immunological</b> |
| Cell Count<br>Differential<br>Chemistry<br>Cytology                                                                      | Viral panel<br>(Negative)                                                                                           | Gram stain<br>Bacterial cultures | Oligoclonal bands    |
| WBC: 3 lymphocytes,<br>Red blood cells: 16,<br>Glucose 59 mg/dL<br>and protein 37 mg/<br>dL<br>CSF/ serum glucose<br>1.2 | Influenza,<br>HSV 1 & 2, VZV,<br>EBV, enterovirus,<br>adenovirus,<br>parainfluenza,<br>metapneumovirus,<br>RSV, JC, | Negative                         | Negative             |
