# Supplementary material
Source: PubMed Central journal article supplement (PMC4442105)
Supplement: supp_WNL.0000000000001593_Supplementary_Table_e-2.pdf [file supp_WNL.0000000000001593_Supplementary_Table_e-2.pdf]

**Supplementary Table e-2: Serum Investigations**

| Complete Blood Count | Chemistry<br>(Within normal limits) |                                                                             | Infectious Studies<br>(Negative) |                                                                                                         |
|----------------------|-------------------------------------|-----------------------------------------------------------------------------|----------------------------------|---------------------------------------------------------------------------------------------------------|
|                      | Comprehensive Metabolic Panel       | Additional Studies                                                          | Viral PCR                        | Bacterial Cultures & Bacterial Serology                                                                 |
| Normal               |                                     | TSH, ammonia, B <sub>12</sub> , cortisol, lactate, pyruvate, LFTs, ESR, CRP | HIV, Hepatitis C                 | Coxiella Burnetti, Streptococcus, Haemophilus Influenzae, Neisseria, Cryptococcus, and Salmonella Typhi |
|                      |                                     | Carbon monoxide                                                             |                                  |                                                                                                         |
