# Supplementary material
Source: PubMed Central journal article supplement (PMC4442105)
Supplement: supp_WNL.0000000000001593_Supplementary_table_e-3.pdf [file supp_WNL.0000000000001593_Supplementary_table_e-3.pdf]

**Supplementary table e-3: Paraneoplastic investigations**

| <b>Serum Antibodies<br/>(Negative)</b>                                                                             | <b>Imaging<br/>(Negative)</b>                                                      |
|--------------------------------------------------------------------------------------------------------------------|------------------------------------------------------------------------------------|
| AMPAR, mGluR1/R5, LGI1, Caspr2, Hu, Yo,<br>Ri, CV2, Tr, amphiphysin, Ma2, Glutamic<br>acid decarboxylate, Horner-3 | CT chest-abdomen-pelvis<br>(with & without intravenous contrast)<br><br>Breast MRI |
